# Supplementary material
Source: MDPI journal article supplement (https://www.mdpi.com/2304-6740/12/2/41)
Supplement: s1 [file s1]

# Ferrocene-bearing Homoleptic and Heteroleptic Paddlewheel-type Dirhodium Complexes

Yusuke Kataoka<sup>1,\*</sup>, Kozo Sato<sup>1</sup>, Natsumi Yano<sup>1,2</sup>, and Makoto Handa<sup>1,\*</sup>

1. Department of Chemistry, Graduate School of Natural Science and Technology, Shimane University, 1060, Nishikawatsu, Matsue, Shimane 690-8504, Japan.
2. Special Course in Science and Engineering, Graduate School of Natural Science and Technology, Shimane University, 1060, Nishikawatsu, Matsue, Shimane 690-8504, Japan.

## *Contents*

- Table S1. Averaged bond lengths (Å) of observed and optimized geometries of  $[\text{Rh}_2(\text{fca})_4(\text{MeOH})_2]$  (**1**(MeOH)<sub>2</sub>).
- Table S2. Averaged bond lengths (Å) of observed and optimized geometries of  $[\text{Rh}_2(\text{fca})(\text{piv})_3(\text{MeOH})_2]$  (**2**(MeOH)<sub>2</sub>).
- Table S3. TDDFT results (excitation wavelength, oscillator strength, and orbital contribution) of **1**(MeOH)<sub>2</sub>.
- Table S4. TDDFT results (excitation wavelength, oscillator strength, and orbital contribution) of **2**(MeOH)<sub>2</sub>.
- Table S5. Selected bond lengths (Å) and angles (°) of **1**(MeOH)<sub>2</sub>.
- Table S6. Selected bond lengths (Å) and angles (°) of **2**(MeOH)<sub>2</sub>.
- Figure S1. <sup>1</sup>H NMR spectrum of **1** in DMSO-*d*<sub>6</sub>.
- Figure S2. <sup>1</sup>H NMR spectrum of **2** in DMSO-*d*<sub>6</sub>.
- Figure S3. Observed and simulated ESI-TOF-MS spectra of **1**.
- Figure S4. Observed and simulated ESI-TOF-MS spectra of **2**.
- Figure S5. Optimized geometries of **1**(MeOH)<sub>2</sub> (left) and **2**(MeOH)<sub>2</sub> (right).
- Figure S6. Diffuse reflectance (DR) spectrum of **1**.
- Figure S7. Observed spectra (black line) and calculated vertical excitations (red line) of (a) **1**(MeOH)<sub>2</sub> and (b) **2**(MeOH)<sub>2</sub>.
- Figure S8. Differential pulse voltammetry (DPV) diagram of **1** (0.10 mM) in 9:1 CHCl<sub>3</sub>-MeOH solution containing 0.10 M TBAPF<sub>6</sub>.

Table S1. Averaged bond lengths (Å) of observed and optimized geometries of  $[\text{Rh}_2(\text{fca})_4(\text{MeOH})_2]$  (**1(MeOH)<sub>2</sub>**).

|                        | observed geometry | optimized geometry |
|------------------------|-------------------|--------------------|
| Rh-Rh                  | 2.377             | 2.407              |
| Rh-O <sub>(fca)</sub>  | 2.033             | 2.066              |
| Rh-O <sub>(MeOH)</sub> | 2.283             | 2.389              |

Table S2. Averaged bond lengths (Å) of observed and optimized geometries of  $[\text{Rh}_2(\text{fca})(\text{piv})_3(\text{MeOH})_2]$  (**2(MeOH)<sub>2</sub>**).

|                             | observed geometry | optimized geometry |
|-----------------------------|-------------------|--------------------|
| Rh-Rh                       | 2.371             | 2.405              |
| Rh-O <sub>(fca)</sub>       | 2.031             | 2.067              |
| Rh-O <sub>(trans-piv)</sub> | 2.030             | 2.067              |
| Rh-O <sub>(cis-piv)</sub>   | 2.027             | 2.068              |
| Rh-O <sub>(MeOH)</sub>      | 2.296             | 2.390              |

Table S3. TDDFT results (excitation wavelength, oscillator strength, and orbital contribution) of **1(MeOH)<sub>2</sub>**.

| Excitation state | Wavelength (nm) | Oscillator strength | Orbital contribution                                                                                                                                                                                                                                                                                                                                                                                                                           |
|------------------|-----------------|---------------------|------------------------------------------------------------------------------------------------------------------------------------------------------------------------------------------------------------------------------------------------------------------------------------------------------------------------------------------------------------------------------------------------------------------------------------------------|
| S <sub>1</sub>   | 594.4           | 0.0043              | H-8[ $\pi^*(\text{Rh}_2)$ ] $\rightarrow$ L[ $\sigma^*(\text{Rh}_2)$ ] (84%), H-10[ $\pi^*(\text{Rh}_2)$ ] $\rightarrow$ L+1[ <i>anti-bonding-dx<sup>2</sup>-y<sup>2</sup></i> (Rh <sub>2</sub> )] (6%), H-4[d(fca)] $\rightarrow$ L[ $\sigma^*(\text{Rh}_2)$ ] (6%)                                                                                                                                                                           |
| S <sub>2</sub>   | 585.5           | 0.0001              | H-6[d(fca)] $\rightarrow$ L+2[d(fca)] (21%), H-5[d(fca)] $\rightarrow$ L+7[d(fca)] (16%), H-7[d(fca)] $\rightarrow$ L+5[delocalization] (7%), H-2[d(fca)] $\rightarrow$ L+9[d(fca)] (7%), H-7[d(fca)] $\rightarrow$ L+4[delocalization] (6%), H-6[d(fca)] $\rightarrow$ L+13[d(fca)] (5%), H-1[d(fca)] $\rightarrow$ L+5[delocalization] (5%), H[d(fca)] $\rightarrow$ L+9[d(fca)] (5%)                                                        |
| S <sub>4</sub>   | 584.9           | 0.0001              | H-4[d(fca)] $\rightarrow$ L+3[d(fca)] (20%), H-3[d(fca)] $\rightarrow$ L+8[d(fca)] (15%), H[d(fca)] $\rightarrow$ L+10[d(fca)] (7%), H-1[d(fca)] $\rightarrow$ L+4[delocalization] (5%), H-2[d(fca)] $\rightarrow$ L+10[d(fca)] (5%)                                                                                                                                                                                                           |
| S <sub>6</sub>   | 582.9           | 0.0059              | H-10[ $\pi^*(\text{Rh}_2)$ ] $\rightarrow$ L[ $\sigma^*(\text{Rh}_2)$ ] (23%), H-6[d(fca)] $\rightarrow$ L+9[d(fca)] (9%), H-2[d(fca)] $\rightarrow$ L+2[d(fca)] (8%), H-5[d(fca)] $\rightarrow$ L+5[delocalization] (8%), H[d(fca)] $\rightarrow$ L+2[d(fca)] (7%) H-5[d(fca)] $\rightarrow$ L+4[delocalization] (7%), H-7[d(fca)] $\rightarrow$ L+7[d(fca)] (7%)                                                                             |
| S <sub>8</sub>   | 582.1           | 0.0034              | H[d(fca)] $\rightarrow$ L+3[d(fca)] (10%), H-4[d(fca)] $\rightarrow$ L+10[d(fca)] (9%), H-1[d(fca)] $\rightarrow$ L+8[d(fca)] (7%), H-2[d(fca)] $\rightarrow$ L+3[d(fca)] (7%), H-3[d(fca)] $\rightarrow$ L+6 [ <i>bonding-dx<sup>2</sup>-y<sup>2</sup></i> (Rh <sub>2</sub> )] (7%), H-3[d(fca)] $\rightarrow$ L+4[delocalization] (7%), H-7[d(fca)] $\rightarrow$ L+8[d(fca)] (7%)                                                           |
| S <sub>10</sub>  | 581.0           | 0.0006              | H-10[ $\pi^*(\text{Rh}_2)$ ] $\rightarrow$ L[ $\sigma^*(\text{Rh}_2)$ ] (62%), H-8[ $\pi^*(\text{Rh}_2)$ ] $\rightarrow$ L+1[ <i>anti-bonding-dx<sup>2</sup>-y<sup>2</sup></i> (Rh <sub>2</sub> )] (5%)                                                                                                                                                                                                                                        |
| S <sub>11</sub>  | 503.4           | 0.0019              | H-13[d(fca)] $\rightarrow$ L+5[delocalization] (11%), H-6[d(fca)] $\rightarrow$ L+9[d(fca)] (11%), H-13[d(fca)] $\rightarrow$ L+4[delocalization] (9%), H-14[d(fca)] $\rightarrow$ L+2[d(fca)] (9%), H-7[d(fca)] $\rightarrow$ L+7[d(fca)] (8%), H-1[d(fca)] $\rightarrow$ L+7[d(fca)] (5%), H-15[d(fca)] $\rightarrow$ L+2[d(fca)] (5%)                                                                                                       |
| S <sub>14</sub>  | 503.1           | 0.0018              | H-4[d(fca)] $\rightarrow$ L+10[d(fca)] (10%), H-14[d(fca)] $\rightarrow$ L+3[d(fca)] (9%), H-12[d(fca)] $\rightarrow$ L+6[ <i>bonding-dx<sup>2</sup>-y<sup>2</sup></i> (Rh <sub>2</sub> )] (8%), H-12[d(fca)] $\rightarrow$ L+4[delocalization] (8%), H-1[d(fca)] $\rightarrow$ L+8[d(fca)] (7%), H-7[d(fca)] $\rightarrow$ L+8[d(fca)] (7%), H-12[d(fca)] $\rightarrow$ L+5[delocalization] (5%), H-15[d(fca)] $\rightarrow$ L+3[d(fca)] (5%) |
| S <sub>16</sub>  | 492.8           | 0.0001              | H-13[d(fca)] $\rightarrow$ L+7[d(fca)] (20%), H-5[d(fca)] $\rightarrow$ L+7[d(fca)] (19%), H-2[d(fca)] $\rightarrow$ L+9[d(fca)] (10%), H-14[d(fca)] $\rightarrow$ L+9[d(fca)] (9%), H-6[d(fca)] $\rightarrow$ L+2[d(fca)] (6%), H[d(fca)] $\rightarrow$ L+9[d(fca)] (5%)                                                                                                                                                                      |
| S <sub>22</sub>  | 432.3           | 0.0026              | H-8[ $\pi^*(\text{Rh}_2)$ ] $\rightarrow$ L+1[ <i>anti-bonding-dx<sup>2</sup>-y<sup>2</sup></i> (Rh <sub>2</sub> )] (80%), H-10[ $\pi^*(\text{Rh}_2)$ ] $\rightarrow$ L[ $\sigma^*(\text{Rh}_2)$ ] (8%), H-4[d(fca)] $\rightarrow$ L+1[ <i>anti-bonding-dx<sup>2</sup>-y<sup>2</sup></i> (Rh <sub>2</sub> )] (6%)                                                                                                                              |

|                 |       |        |                                                                                                                                                                                                                                                                                                                                                                                                                                                                                                                                                                 |
|-----------------|-------|--------|-----------------------------------------------------------------------------------------------------------------------------------------------------------------------------------------------------------------------------------------------------------------------------------------------------------------------------------------------------------------------------------------------------------------------------------------------------------------------------------------------------------------------------------------------------------------|
| S <sub>23</sub> | 424.9 | 0.0028 | H-10[ $\pi^*(\text{Rh}_2)$ ] $\rightarrow$ L+1[ <i>anti-bonding</i> -dx <sup>2</sup> -y <sup>2</sup> (Rh <sub>2</sub> )] (86%), H-8[ $\pi^*(\text{Rh}_2)$ ] $\rightarrow$ L[ $\sigma^*(\text{Rh}_2)$ ] (6%)                                                                                                                                                                                                                                                                                                                                                     |
| S <sub>26</sub> | 379.7 | 0.0017 | H-6[d(fca)] $\rightarrow$ L+9[d(fca)] (11%), H-13[d(fca)] $\rightarrow$ L+5[delocalization] (9%), H-7[d(fca)] $\rightarrow$ L+7[d(fca)] (9%),<br>H-14[d(fca)] $\rightarrow$ L+2[d(fca)] (8%), H-13[d(fca)] $\rightarrow$ L+4[delocalization] (8%), H-2[d(fca)] $\rightarrow$ L+2[d(fca)] (6%),<br>H-1[d(fca)] $\rightarrow$ L+7[d(fca)] (6%), H[d(fca)] $\rightarrow$ L+2[d(fca)] (5%), H-5[d(fca)] $\rightarrow$ L+4[delocalization] (5%),<br>H-5[d(fca)] $\rightarrow$ L+5[delocalization] (5%), H-11[ $\delta(\text{Rh}_2)$ ] $\rightarrow$ L+2[d(fca)] (5%) |
| S <sub>28</sub> | 379.4 | 0.0017 | H-4[d(fca)] $\rightarrow$ L+10[d(fca)] (10%), H-14[d(fca)] $\rightarrow$ L+3[d(fca)] (8%), H-7[d(fca)] $\rightarrow$ L+8[d(fca)] (7%),<br>H-12[d(fca)] $\rightarrow$ L+4[delocalization] (7%), H-1[d(fca)] $\rightarrow$ L+8[d(fca)] (7%), H-12[d(fca)] $\rightarrow$ L+6[bonding]-dx <sup>2</sup> -y <sup>2</sup> (Rh <sub>2</sub> )] (7%),<br>H[d(fca)] $\rightarrow$ L+3[d(fca)] (6%), H-2[d(fca)] $\rightarrow$ L+3[d(fca)] (5%), H-11[ $\delta(\text{Rh}_2)$ ] $\rightarrow$ L+3[d(fca)] (5%)                                                              |
| S <sub>32</sub> | 367.5 | 0.0003 | H-13[d(fca)] $\rightarrow$ L+7[d(fca)] (23%), H-14[d(fca)] $\rightarrow$ L+9[d(fca)] (13%), H-5[d(fca)] $\rightarrow$ L+7[d(fca)] (11%),<br>H-6[d(fca)] $\rightarrow$ L+2[d(fca)] (9%), H-2[d(fca)] $\rightarrow$ L+9[d(fca)] (6%), H-15[d(fca)] $\rightarrow$ L+10[d(fca)] (5%)                                                                                                                                                                                                                                                                                |
| S <sub>38</sub> | 357.3 | 0.0018 | H-4[d(fca)] $\rightarrow$ L[ $\sigma^*(\text{Rh}_2)$ ] (89%), H-8[ $\pi^*(\text{Rh}_2)$ ] $\rightarrow$ L[ $\sigma^*(\text{Rh}_2)$ ] (6%)                                                                                                                                                                                                                                                                                                                                                                                                                       |
| S <sub>39</sub> | 357.2 | 0.0019 | H-6[d(fca)] $\rightarrow$ L[ $\sigma^*(\text{Rh}_2)$ ] (94%)                                                                                                                                                                                                                                                                                                                                                                                                                                                                                                    |
| S <sub>44</sub> | 322.0 | 0.0001 | H[d(fca)] $\rightarrow$ L+1[ <i>anti-bonding</i> -dx <sup>2</sup> -y <sup>2</sup> (Rh <sub>2</sub> )] (89%)                                                                                                                                                                                                                                                                                                                                                                                                                                                     |
| S <sub>49</sub> | 316.5 | 0.0044 | H-4[d(fca)] $\rightarrow$ L+1[ <i>anti-bonding</i> -dx <sup>2</sup> -y <sup>2</sup> (Rh <sub>2</sub> )] (89%), H-8[ $\pi^*(\text{Rh}_2)$ ] $\rightarrow$ L+1[ <i>anti-bonding</i> -dx <sup>2</sup> -y <sup>2</sup> (Rh <sub>2</sub> )] (6%)                                                                                                                                                                                                                                                                                                                     |
| S <sub>50</sub> | 316.4 | 0.0044 | H-6[d(fca)] $\rightarrow$ L+1[ <i>anti-bonding</i> -dx <sup>2</sup> -y <sup>2</sup> (Rh <sub>2</sub> )] (94%)                                                                                                                                                                                                                                                                                                                                                                                                                                                   |
| S <sub>56</sub> | 310.0 | 0.0002 | H-10[ $\pi^*(\text{Rh}_2)$ ] $\rightarrow$ L+2[d(fca)] (74%), H-8[ $\pi^*(\text{Rh}_2)$ ] $\rightarrow$ L+2[d(fca)] (18%)                                                                                                                                                                                                                                                                                                                                                                                                                                       |
| S <sub>58</sub> | 307.8 | 0.0001 | H-10[ $\pi^*(\text{Rh}_2)$ ] $\rightarrow$ L+3[d(fca)] (85%), H-8[ $\pi^*(\text{Rh}_2)$ ] $\rightarrow$ L+3[d(fca)] (8%)                                                                                                                                                                                                                                                                                                                                                                                                                                        |
| S <sub>60</sub> | 303.0 | 0.0036 | H-6[d(fca)] $\rightarrow$ L+13[d(fca)] (23%), H-6[d(fca)] $\rightarrow$ L+2[d(fca)] (18%), H-6[d(fca)] $\rightarrow$ L+12[d(fca)] (11%),<br>H-7[d(fca)] $\rightarrow$ L+14[d(fca)] (11%), H-1[d(fca)] $\rightarrow$ L+14[d(fca)] (8%), H-7[d(fca)] $\rightarrow$ L+16[d(fca)] (7%),<br>H-1[d(fca)] $\rightarrow$ L+16[d(fca)] (5%)                                                                                                                                                                                                                              |
| S <sub>62</sub> | 302.1 | 0.0037 | H-4[d(fca)] $\rightarrow$ L+3[d(fca)] (17%), H-4[d(fca)] $\rightarrow$ L+12[d(fca)] (16%), H-4[d(fca)] $\rightarrow$ L+13[d(fca)] (10%),<br>H-7[d(fca)] $\rightarrow$ L+14[d(fca)] (7%), H-7[d(fca)] $\rightarrow$ L+16[d(fca)] (7%), H-4[d(fca)] $\rightarrow$ L+15[d(fca)] (7%),<br>H-1[d(fca)] $\rightarrow$ L+14[d(fca)] (7%), H-1[d(fca)] $\rightarrow$ L+16[d(fca)] (9%)                                                                                                                                                                                  |
| S <sub>65</sub> | 300.0 | 0.0024 | H-9[ $\delta^*(\text{Rh}_2)$ ] $\rightarrow$ L+4[delocalization] (53%), H-1[d(fca)] $\rightarrow$ L+4[delocalization] (21%), H-16[ $\sigma(\text{Rh}_2)$ ] $\rightarrow$ L[ $\sigma^*(\text{Rh}_2)$ ] (9%)                                                                                                                                                                                                                                                                                                                                                      |

Table S4. TDDFT results (excitation wavelength, oscillator strength, and orbital contribution) of **2(MeOH)<sub>2</sub>**.

| Excitation state | Wavelength (nm) | Oscillator strength | Orbital contribution                                                                                                                                                                                                                                                                                                                                                         |
|------------------|-----------------|---------------------|------------------------------------------------------------------------------------------------------------------------------------------------------------------------------------------------------------------------------------------------------------------------------------------------------------------------------------------------------------------------------|
| S <sub>1</sub>   | 594.4           | 0.0038              | H-2[ $\pi^*(\text{Rh}_2)$ ] $\rightarrow$ L[ $\sigma^*(\text{Rh}_2)$ ] (85%), H-3[ $\pi^*(\text{Rh}_2)$ ] $\rightarrow$ L+1[ <i>anti-bonding</i> -dx <sup>2</sup> -y <sup>2</sup> (Rh <sub>2</sub> )] (6%), H-1[d(fca)] $\rightarrow$ L[ $\sigma^*(\text{Rh}_2)$ ] (5%)                                                                                                      |
| S <sub>2</sub>   | 583.9           | 0.0001              | H-1[d(fca)] $\rightarrow$ L+2[d(fca)] (33%), H[d(fca)] $\rightarrow$ L+4[d(fca)] (32%), H-1[d(fca)] $\rightarrow$ L+6[d(fca)] (10%), H-1[d(fca)] $\rightarrow$ L+3[ <i>bonding</i> -dx <sup>2</sup> -y <sup>2</sup> (Rh <sub>2</sub> )] (9%)                                                                                                                                 |
| S <sub>3</sub>   | 583.2           | 0.003               | H-3[ $\pi^*(\text{Rh}_2)$ ] $\rightarrow$ L[ $\sigma^*(\text{Rh}_2)$ ](82%), H-2[ $\pi^*(\text{Rh}_2)$ ] $\rightarrow$ L+1[ <i>anti-bonding</i> -dx <sup>2</sup> -y <sup>2</sup> (Rh <sub>2</sub> )] (7%)                                                                                                                                                                    |
| S <sub>4</sub>   | 580.7           | 0.0012              | H[d(fca)] $\rightarrow$ L+2[d(fca)] (33%), H-1[d(fca)] $\rightarrow$ L+4[d(fca)] (32%), H[d(fca)] $\rightarrow$ L+6[d(fca)] (12%), H[d(fca)] $\rightarrow$ L+3[ <i>bonding</i> -dx <sup>2</sup> -y <sup>2</sup> (Rh <sub>2</sub> )] (10%)                                                                                                                                    |
| S <sub>5</sub>   | 502.4           | 0.0008              | H-5[d(fca)] $\rightarrow$ L+2[d(fca)] (28%), H-1[d(fca)] $\rightarrow$ L+4[d(fca)] (26%), H-5[d(fca)] $\rightarrow$ L+6[d(fca)] (11%), H[d(fca)] $\rightarrow$ L+2[d(fca)] (9%), H-5[d(fca)] $\rightarrow$ L+3[ <i>bonding</i> -dx <sup>2</sup> -y <sup>2</sup> (Rh <sub>2</sub> )] (8%)                                                                                     |
| S <sub>10</sub>  | 433.9           | 0.002               | H-2[ $\pi^*(\text{Rh}_2)$ ] $\rightarrow$ L+1[ <i>anti-bonding</i> -dx <sup>2</sup> -y <sup>2</sup> (Rh <sub>2</sub> )] (82%), H-3[ $\pi^*(\text{Rh}_2)$ ] $\rightarrow$ L[ $\sigma^*(\text{Rh}_2)$ ](8%)                                                                                                                                                                    |
| S <sub>11</sub>  | 427.4           | 0.0024              | H-3[ $\pi^*(\text{Rh}_2)$ ] $\rightarrow$ L+1[ <i>anti-bonding</i> -dx <sup>2</sup> -y <sup>2</sup> (Rh <sub>2</sub> )] (83%), H-2[ $\pi^*(\text{Rh}_2)$ ] $\rightarrow$ L[ $\sigma^*(\text{Rh}_2)$ ](7%)                                                                                                                                                                    |
| S <sub>14</sub>  | 378.8           | 0.0007              | H-5[d(fca)] $\rightarrow$ L+2[d(fca)] (27%), H-1[d(fca)] $\rightarrow$ L+4[d(fca)] (27%), H[d(fca)] $\rightarrow$ L+2[d(fca)] (17%), H-5[d(fca)] $\rightarrow$ L+6[d(fca)] (7%), H-5[d(fca)] $\rightarrow$ L+3[ <i>bonding</i> -dx <sup>2</sup> -y <sup>2</sup> (Rh <sub>2</sub> )] (7%)                                                                                     |
| S <sub>15</sub>  | 367.0           | 0.0001              | H-5[d(fca)] $\rightarrow$ L+4[d(fca)] (50%), H[d(fca)] $\rightarrow$ L+4[d(fca)] (24%), H-1[d(fca)] $\rightarrow$ L+2[d(fca)] (14%)                                                                                                                                                                                                                                          |
| S <sub>17</sub>  | 354.8           | 0.0009              | H-1[d(fca)] $\rightarrow$ L[ $\sigma^*(\text{Rh}_2)$ ](84%), H-4[ $\delta^*(\text{Rh}_2)$ ] $\rightarrow$ L[ $\sigma^*(\text{Rh}_2)$ ] (8%), H-2[ $\pi^*(\text{Rh}_2)$ ] $\rightarrow$ L[ $\sigma^*(\text{Rh}_2)$ ](5%)                                                                                                                                                      |
| S <sub>20</sub>  | 320.3           | 0.0001              | H-11[ $\pi(\text{Rh}_2)$ ] $\rightarrow$ L[ $\sigma^*(\text{Rh}_2)$ ](73%), H-9[ $\pi(\text{Rh}_2)$ ] $\rightarrow$ L[ $\sigma^*(\text{Rh}_2)$ ](7%), H-2[ $\pi^*(\text{Rh}_2)$ ] $\rightarrow$ L+2[d(fca)] (6%)                                                                                                                                                             |
| S <sub>22</sub>  | 315.4           | 0.0021              | H-1[d(fca)] $\rightarrow$ L+1[ <i>anti-bonding</i> -dx <sup>2</sup> -y <sup>2</sup> (Rh <sub>2</sub> )] (85%), H-4[ $\delta^*(\text{Rh}_2)$ ] $\rightarrow$ L+1[ <i>anti-bonding</i> -dx <sup>2</sup> -y <sup>2</sup> (Rh <sub>2</sub> )] (7%), H-2[ $\pi^*(\text{Rh}_2)$ ] $\rightarrow$ L+1[ <i>anti-bonding</i> -dx <sup>2</sup> -y <sup>2</sup> (Rh <sub>2</sub> )] (5%) |
| S <sub>24</sub>  | 303.5           | 0.0002              | H-3[ $\pi^*(\text{Rh}_2)$ ] $\rightarrow$ L+2[d(fca)] (58%), H-3[ $\pi^*(\text{Rh}_2)$ ] $\rightarrow$ L+3[ <i>bonding</i> -dx <sup>2</sup> -y <sup>2</sup> (Rh <sub>2</sub> )] (19%), H-2[ $\pi^*(\text{Rh}_2)$ ] $\rightarrow$ L+2[d(fca)] (12%)                                                                                                                           |
| S <sub>25</sub>  | 302.5           | 0.0017              | H-4[ $\delta^*(\text{Rh}_2)$ ] $\rightarrow$ L+2[d(fca)] (47%), H-1[d(fca)] $\rightarrow$ L+2[d(fca)] (13%), H-1[d(fca)] $\rightarrow$ L+6[d(fca)] (10%), H-4[ $\delta^*(\text{Rh}_2)$ ] $\rightarrow$ L+3[ <i>bonding</i> -dx <sup>2</sup> -y <sup>2</sup> (Rh <sub>2</sub> )] (10%), H-3[ $\pi^*(\text{Rh}_2)$ ] $\rightarrow$ L+2[d(fca)] (6%)                            |
| S <sub>26</sub>  | 300.6           | 0.0005              | H-1[d(fca)] $\rightarrow$ L+6[d(fca)] (35%), H-4[ $\delta^*(\text{Rh}_2)$ ] $\rightarrow$ L+2[d(fca)] (24%), H-1[d(fca)] $\rightarrow$ L+2[d(fca)] (10%), H-4[ $\delta^*(\text{Rh}_2)$ ] $\rightarrow$ L+6[d(fca)] (5%), H-1[d(fca)] $\rightarrow$ L+5[d(fca)] (6%)                                                                                                          |

Table S5. Selected bond lengths (Å) and angles (°) of **1(MeOH)<sub>2</sub>**.

| bond lengths (Å) |            |              |            |
|------------------|------------|--------------|------------|
| Rh1-Rh1'         | 2.3771(3)  | Fe1-C7       | 2.045(2)   |
| Rh1-O1           | 2.0226(13) | Fe1-C8       | 2.040(2)   |
| Rh1-O2           | 2.0466(13) | Fe1-C9       | 2.044(2)   |
| Rh1-O3           | 2.0131(12) | Fe1-C10      | 2.046(2)   |
| Rh1-O4           | 2.0502(12) | Fe1-C11      | 2.043(2)   |
| Rh1-O5           | 2.2839(14) | Fe2-C13      | 2.0219(18) |
| C1-O1            | 1.267(2)   | Fe2-C14      | 2.036(2)   |
| C1-O2            | 1.275(2)   | Fe2-C15      | 2.056(2)   |
| C12-O3           | 1.264(2)   | Fe2-C16      | 2.0678(19) |
| C12-O4           | 1.277(2)   | Fe2-C17      | 2.0456(19) |
| Fe1-C2           | 2.0380(18) | Fe2-C18      | 2.042(2)   |
| Fe1-C3           | 2.0484(19) | Fe2-C19      | 2.037(2)   |
| Fe1-C4           | 2.0488(19) | Fe2-C20      | 2.043(2)   |
| Fe1-C5           | 2.038(2)   | Fe2-C21      | 2.046(2)   |
| Fe1-C6           | 2.033(2)   | Fe2-C22      | 2.044(2)   |
| bond angles (°)  |            |              |            |
| Rh1-Rh1'-O1'     | 89.32(4)   | Rh1-Rh1'-O5' | 173.96(4)  |
| Rh1-Rh1'-O2      | 87.53(4)   | O1-C1-O2     | 126.01(17) |
| Rh1-Rh1'-O3'     | 88.24(4)   | O3-C12-O4    | 125.97(17) |
| Rh1-Rh1'-O4      | 88.55(4)   |              |            |

Table S6. Selected bond lengths (Å) and angles (°) of **2(MeOH)<sub>2</sub>**.

| bond lengths (Å) |           |             |           |         |          |
|------------------|-----------|-------------|-----------|---------|----------|
| Rh1-Rh2          | 2.3712(3) | Fe1-C3      | 2.021(4)  | C29-O11 | 1.267(4) |
| Rh1-O1           | 2.029(2)  | Fe1-C4      | 2.042(5)  | C29-O12 | 1.268(4) |
| Rh2-O2           | 2.044(2)  | Fe1-C5      | 2.048(4)  | C40-O13 | 1.266(4) |
| Rh1-O3           | 2.025(2)  | Fe1-C6      | 2.042(4)  | C40-O14 | 1.272(4) |
| Rh2-O4           | 2.029(2)  | Fe1-C7      | 1.988(5)  | C45-O15 | 1.265(4) |
| Rh1-O5           | 2.020(2)  | Fe1-C8      | 1.998(5)  | C45-O16 | 1.273(4) |
| Rh2-O6           | 2.031(3)  | Fe1-C9      | 2.019(5)  | C50-O17 | 1.263(4) |
| Rh1-O7           | 2.033(2)  | Fe1-C10     | 2.034(4)  | C50-O18 | 1.267(4) |
| Rh2-O8           | 2.029(2)  | Fe1-C11     | 2.011(4)  | Fe2-C30 | 2.010(4) |
| Rh1-O9           | 2.285(2)  | Rh3-Rh4     | 2.3724(3) | Fe2-C31 | 2.029(4) |
| Rh2-O10          | 2.310(2)  | Rh3-O11     | 2.036(3)  | Fe2-C32 | 2.044(4) |
| C1-O1            | 1.262(4)  | Rh4-O12     | 2.015(3)  | Fe2-C33 | 2.044(4) |
| C1-O2            | 1.283(4)  | Rh3-O13     | 2.025(2)  | Fe2-C34 | 2.024(4) |
| C12-O3           | 1.272(4)  | Rh4-O14     | 2.031(2)  | Fe2-C35 | 2.019(4) |
| C12-O4           | 1.258(4)  | Rh3-O15     | 2.033(2)  | Fe2-C36 | 2.027(4) |
| C17-O5           | 1.262(4)  | Rh4-O16     | 2.036(2)  | Fe2-C37 | 2.040(4) |
| C17-O6           | 1.267(4)  | Rh3-O17     | 2.008(2)  | Fe2-C38 | 2.053(4) |
| C22-O7           | 1.260(4)  | Rh4-O18     | 2.038(2)  | Fe2-C39 | 2.042(4) |
| C22-O8           | 1.275(4)  | Rh3-O19     | 2.292(2)  |         |          |
| Fe1-C2           | 2.021(3)  | Rh4-O20     | 2.297(3)  |         |          |
| bond angles (°)  |           |             |           |         |          |
| Rh1-Rh2-O2       | 88.34(6)  | Rh3-Rh4-O12 | 88.56(7)  |         |          |
| Rh1-Rh2-O4       | 88.20(7)  | Rh3-Rh4-O14 | 87.85(7)  |         |          |
| Rh1-Rh2-O6       | 87.61(7)  | Rh3-Rh4-O16 | 88.52(6)  |         |          |
| Rh1-Rh2-O8       | 88.07(7)  | Rh3-Rh4-O18 | 87.39(6)  |         |          |
| Rh2-Rh1-O1       | 88.33(7)  | Rh4-Rh3-O11 | 88.16(7)  |         |          |
| Rh2-Rh1-O3       | 88.28(7)  | Rh4-Rh3-O13 | 88.65(7)  |         |          |
| Rh2-Rh1-O5       | 88.80(7)  | Rh4-Rh3-O15 | 87.78(6)  |         |          |
| Rh2-Rh1-O7       | 88.21(7)  | Rh4-Rh3-O17 | 89.03(7)  |         |          |
| Rh1-Rh2-O10      | 178.38(7) | Rh3-Rh4-O20 | 177.59(7) |         |          |
| Rh2-Rh1-O9       | 176.86(7) | Rh4-Rh3-O19 | 174.90(7) |         |          |
| O1-C1-O2         | 124.6(3)  | O11-C29-O12 | 125.9(3)  |         |          |
| O3-C12-O4        | 125.3(3)  | O13-C40-O14 | 124.8(3)  |         |          |
| O5-C17-O6        | 125.1(4)  | O15-C45-O16 | 124.2(3)  |         |          |
| O7-C22-O8        | 124.2(3)  | O17-C50-O18 | 125.2(3)  |         |          |

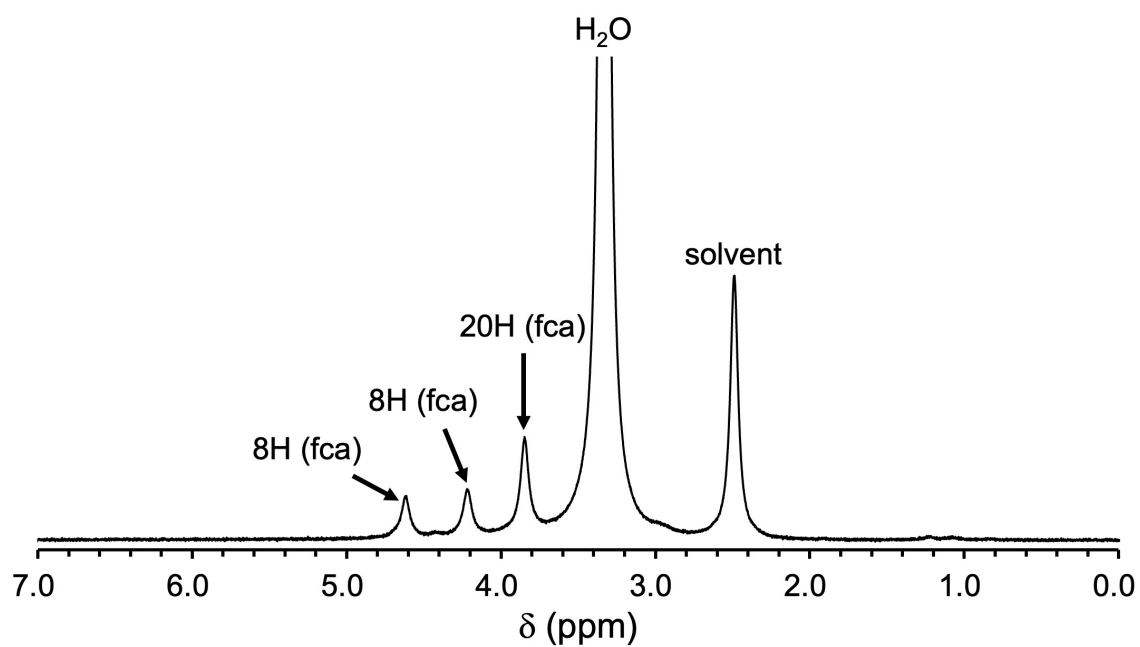

Figure S1.  $^1\text{H}$  NMR spectrum of **1** in  $\text{DMSO}-d_6$ .

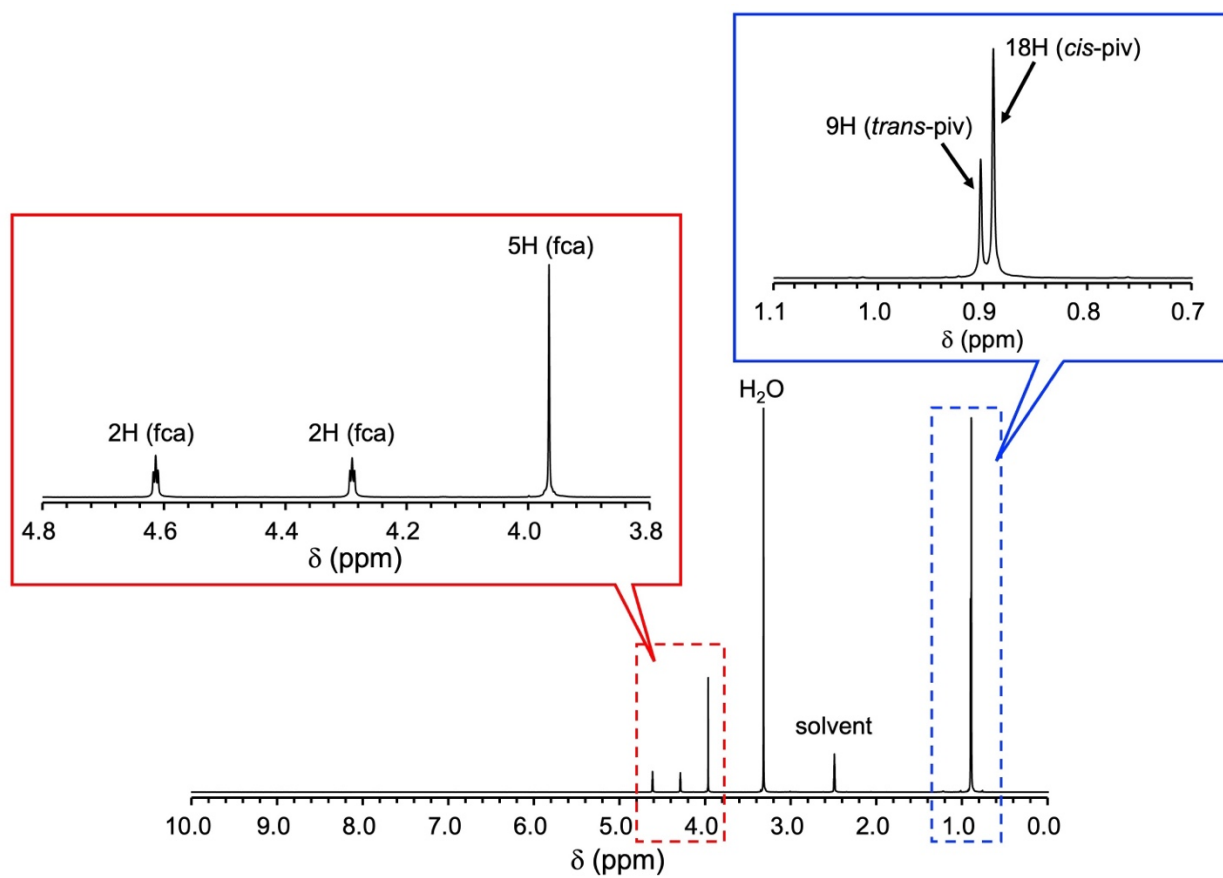

Figure S2.  $^1\text{H}$  NMR spectrum of **2** in  $\text{DMSO}-d_6$ .



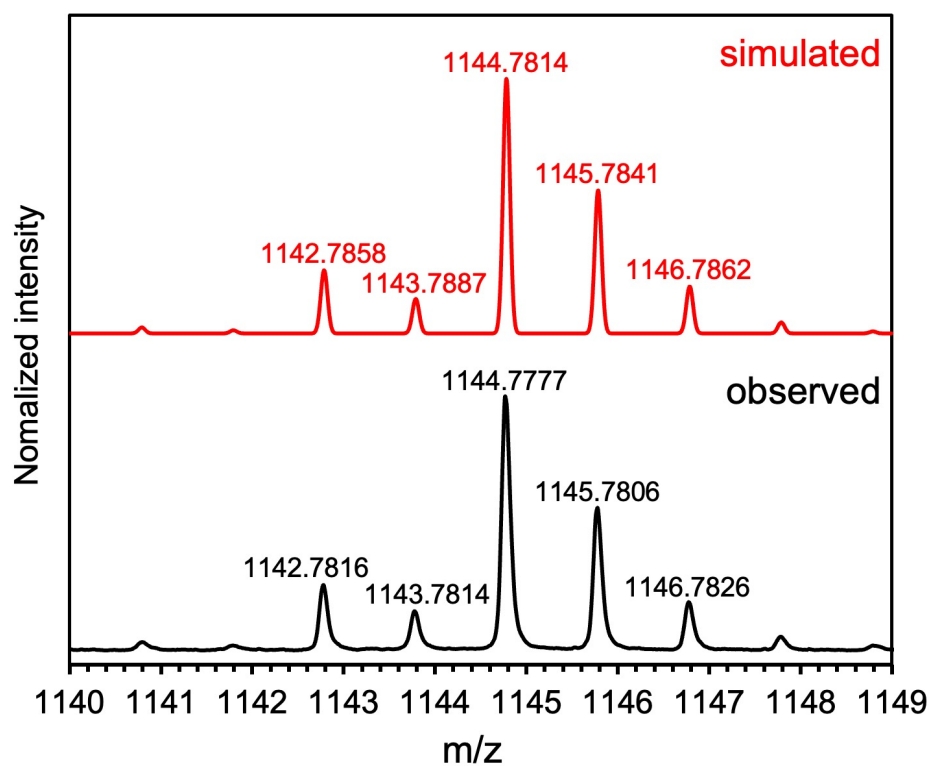

Figure S3. Observed and simulated ESI-TOF-MS spectra of **1**.

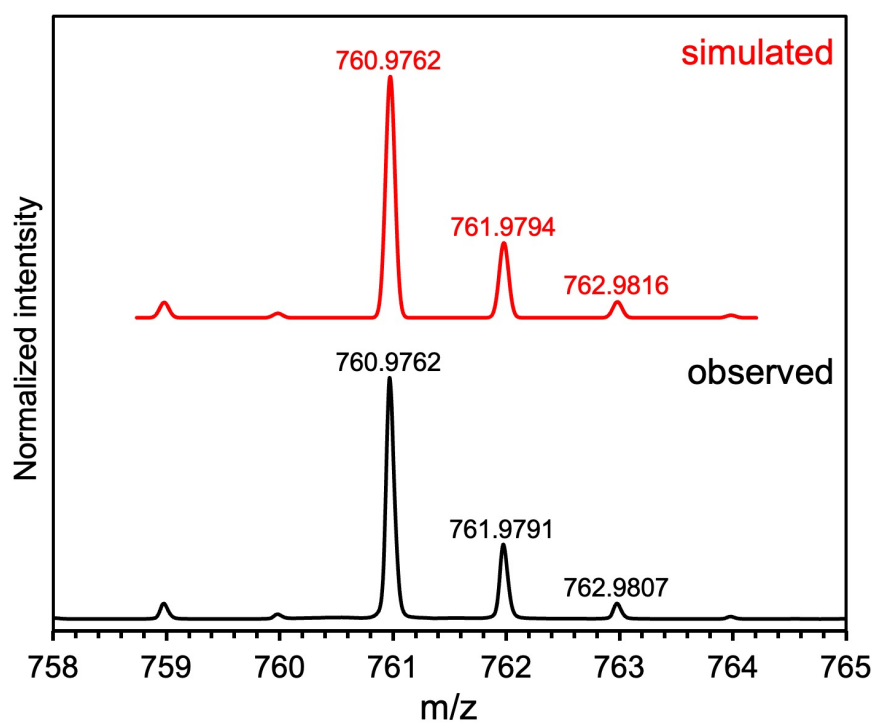

Figure S4. Observed and simulated ESI-TOF-MS spectra of **2**.

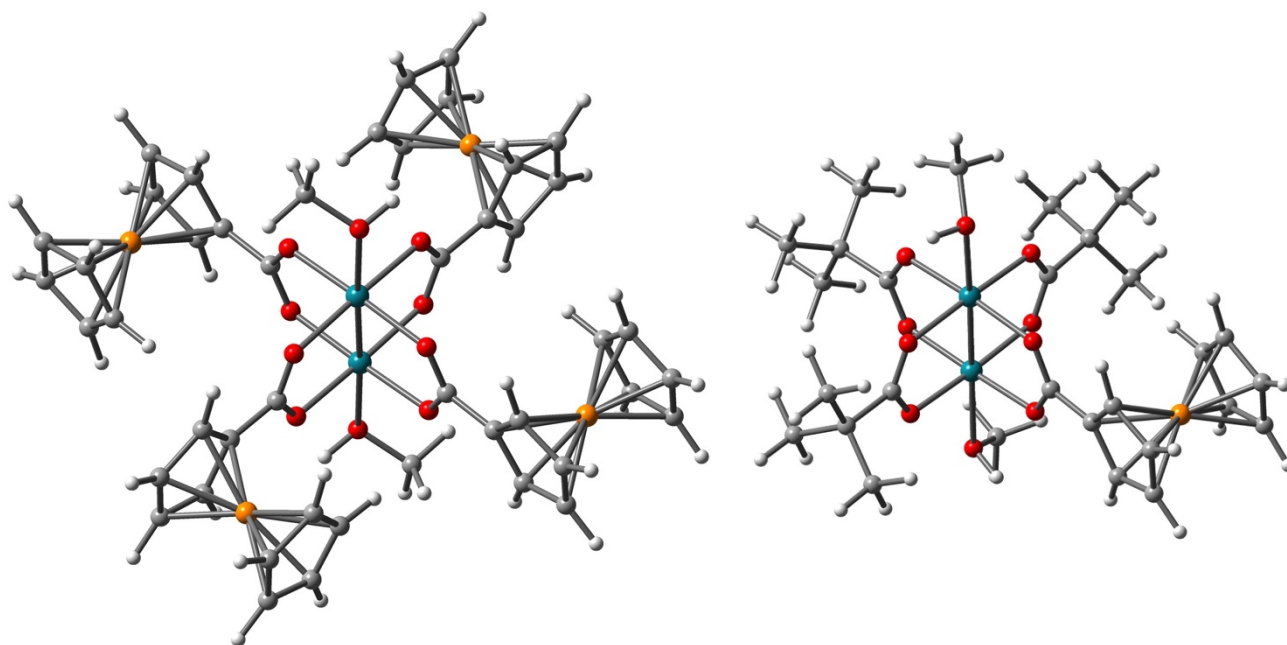

Figure S5. Optimized geometries of **1**(MeOH)<sub>2</sub> (left) and **2**(MeOH)<sub>2</sub> (right).

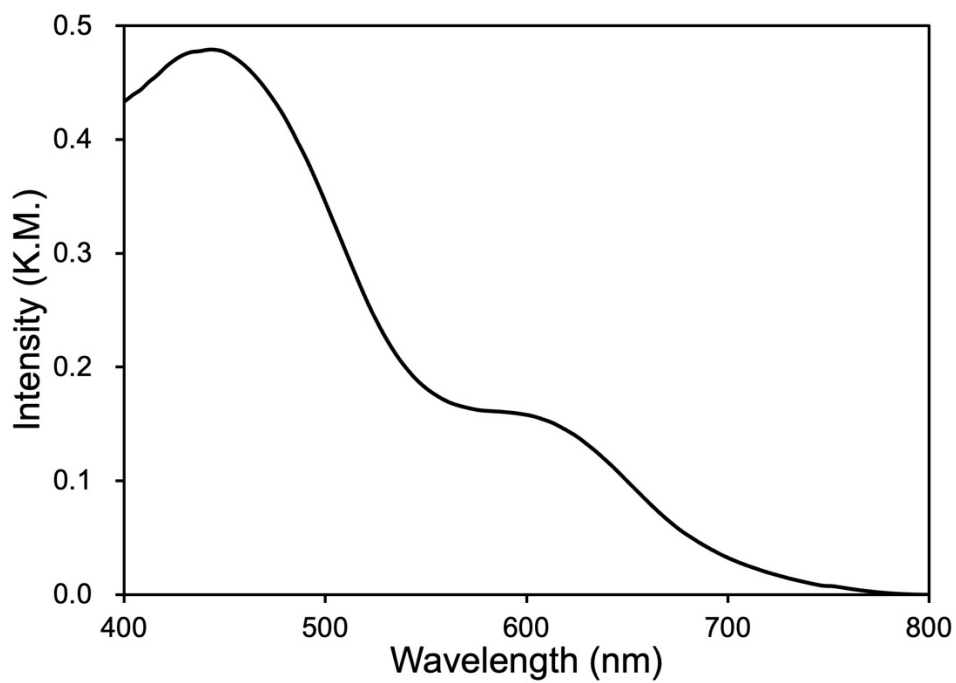

Figure S6. Diffuse reflectance (DR) spectrum of **1**.

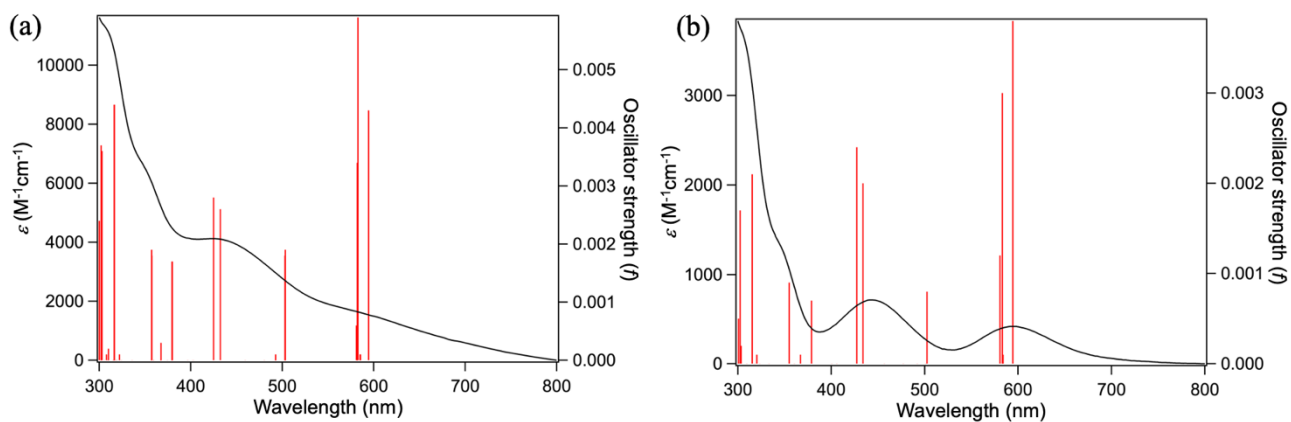

Figure S7. Observed spectra (black line) and calculated vertical excitations (red line) of (a) **1**(MeOH)<sub>2</sub> and (b) **2**(MeOH)<sub>2</sub>.

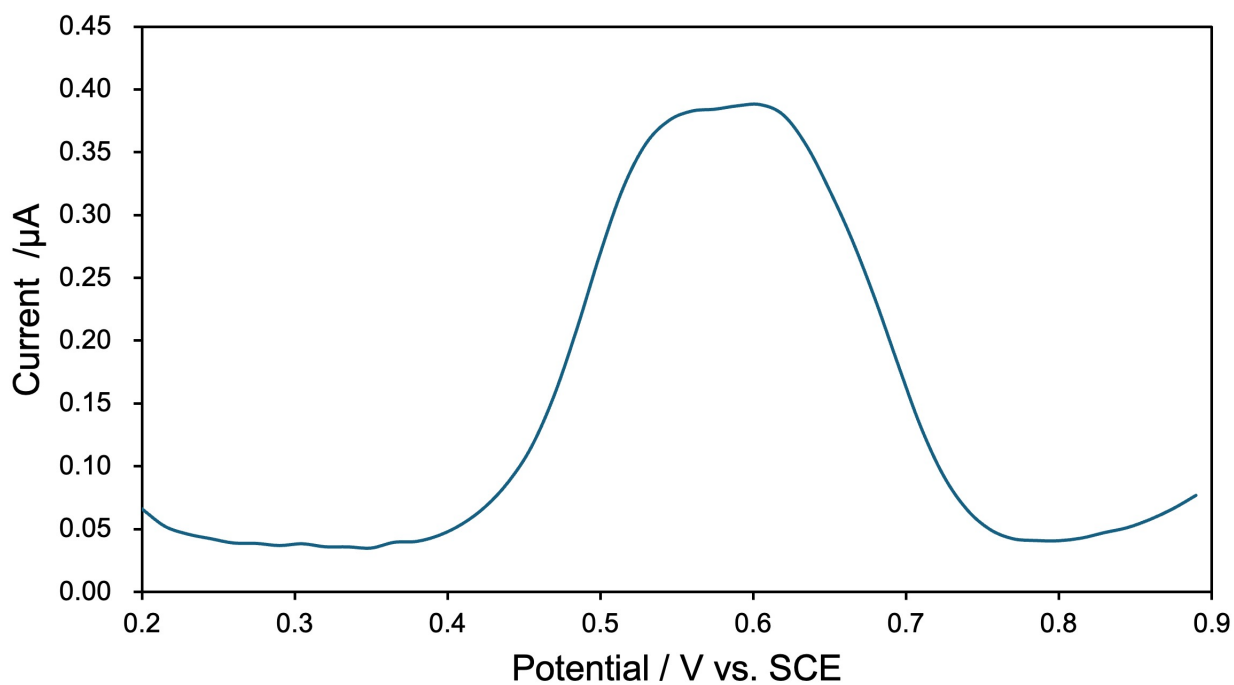

Figure S8. Differential pulse voltammetry (DPV) diagram of **1** (0.10 mM) in 9:1 CHCl<sub>3</sub>-MeOH solution containing 0.10 M TBAPF<sub>6</sub>.
